# Supplementary material for: Boosting Blue Self-Trapped Exciton Emission in All-Inorganic Zero-Dimensional Metal Halide Cs2ZnCl4 via Zirconium (IV) Doping
Source: MDPI journal article supplement (doi:10.3390/molecules29071651), 2024-04-06
Supplement: s1 [file s1]

## Supporting Information

# Boosting Blue Self-Trapped Exciton Emission in All-Inorganic Zero-Dimensional Metal Halide Cs<sub>2</sub>ZnCl<sub>4</sub> via Zirconium (IV) Doping

Ye Tian <sup>1</sup>, Qilin Wei <sup>2\*</sup>, Lian Duan <sup>3</sup> and Chengyu Peng <sup>3,\*</sup>

<sup>1</sup> School of Semiconductors and Physics, North University of China, Taiyuan 030051, China; 20230127@nuc.edu.cn

<sup>2</sup> School of Chemistry and Chemical Engineering, Shandong University, Jinan 250100, China

<sup>3</sup> Traffic Information Engineering Institute, Guangxi Transport Vocational and Technical College, Nanning 530004, China; duanlianxs@foxmail.com

\* Correspondence: qlwei@sdu.edu.cn (Q.W.); chengyu\_peng@126.com (C.P.)

## Experimental method and characterization

### Chemicals

Cesium chloride (CsCl; AR), Zinc chloride (ZnCl<sub>2</sub>; 99%), Zirconium chloride (ZrCl<sub>4</sub>, 99.5%) are all purchased from Macklin. Hydrochloric acid (HCl; ChengDu Chron Chemicals Co.,Ltd, AR, 37 wt% in water), ethanol (EtOH; Guangdong Guanghua Sci-Tech Co.,Ltd, AR) were used without any purification.

### Synthesis of Zr<sup>4+</sup>:Cs<sub>2</sub>ZnCl<sub>4</sub> crystals with Zr<sup>4+</sup> feed ratio = 0, 5%, 10%, 20%, 40%)

Zr<sup>4+</sup>:Cs<sub>2</sub>ZnCl<sub>4</sub> crystals were synthesis by a solvent thermal method. 2mmol CsCl, 1 mmol ZnCl<sub>2</sub> and a certain amount of ZrCl<sub>4</sub> (the amount of ZrCl<sub>4</sub> was decided by the relative mole percent of Zn), 5 mL HCl was added in the 25 mL stainless steel autoclave. The mixture solution was heated at 160 °C for 4 h and then cooled slowly to room temperature. The precipitated Zr<sup>4+</sup>:Cs<sub>2</sub>ZnCl<sub>4</sub> crystals were washed with ethanol and were dried at 80 °C for 8 h.

### Material characterization

A SMARTLAB 3KW X-ray diffractometer with Cu K $\alpha$  radiation ( $\lambda$ = 1.54059 Å) was used to collect the powder X-ray diffraction data in the 2 $\theta$  range of 15°-60°. The scanning electron microscopy (SEM, Hitachi SU8020) was used to observe the morphology. The energy-dispersive spectrometry (EDS, Oxford X-Max Aztec) was used to collect the element composition and distribution. The Raman spectrum were characterized by WITec alpha300R Raman fluorescence spectrometer with a 633 nm laser as an excitation source. The photoluminescence (PL), PL

excitation (PLE) spectrum, time-resolved photoluminescence (TRPL), photoluminescence quantum yields (PLQYs), temperature-dependent PL spectra, and temperature-dependent PL lifetime were obtained on the Edinburgh FLS-1000 spectrofluorometer. The Lambda 750 ultraviolet-visible spectrophotometer was used to measure the absorption spectrum.

### Computational Details

The projector-augmented wave method is used to calculate the band structure, as implemented in the Quantum Espresso soft[1]. The generalized gradient approximation of the Perdew-burke-Ernzerhof parameterization is used for the exchange and correlation functional. The kinetic energy cutoff of 500 eV and a  $4 \times 4 \times 4$  Monkhorst-Pack k-mesh for the wavefunction basis set is used. The energy convergence criterion is set as  $1.0 \times 10^{-6}$  eV for structure relaxations.

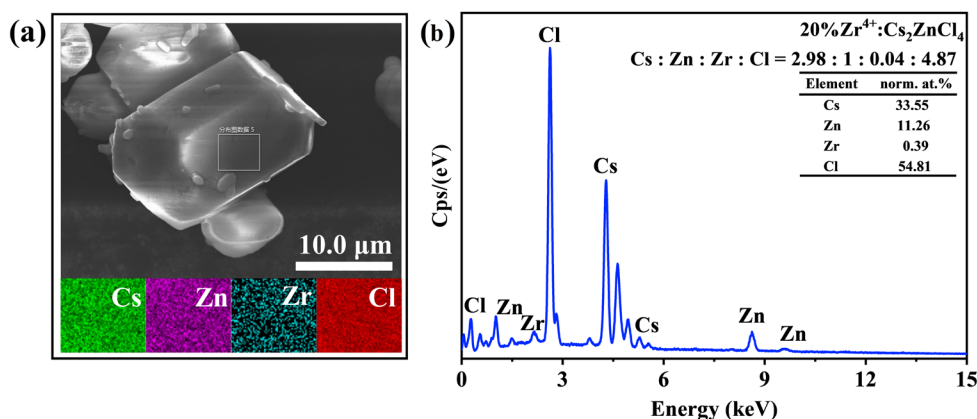

**Figure S1.** (a) The SEM image and element distribution of  $\text{Zr}^{4+}:\text{Cs}_2\text{ZnCl}_4$ . (b) The EDS spectrum and elemental analysis of  $\text{Zr}^{4+}:\text{Cs}_2\text{ZnCl}_4$ .

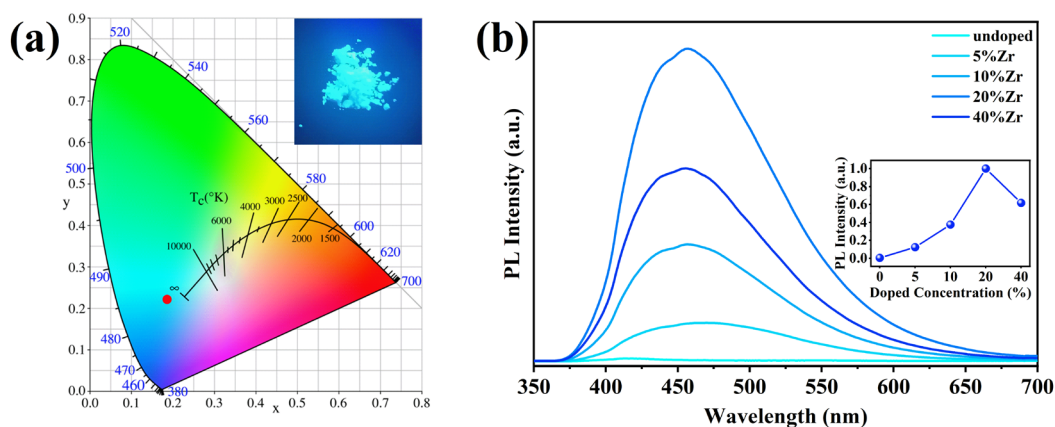

**Figure S2.** (a) The CIE color coordinates of blue emission in  $\text{Zr}^{4+}:\text{Cs}_2\text{ZnCl}_4$ . Insert: the optical photograph of  $\text{Zr}^{4+}:\text{Cs}_2\text{ZnCl}_4$  microcrystals under 254 nm UV light. (b) the PL spectra of  $\text{Cs}_2\text{ZnCl}_4$

with different  $\text{Zr}^{4+}$  feed ratio. Insert: the PL intensity of  $\text{Cs}_2\text{ZnCl}_4$  with different  $\text{Zr}^{4+}$  feed ratio.

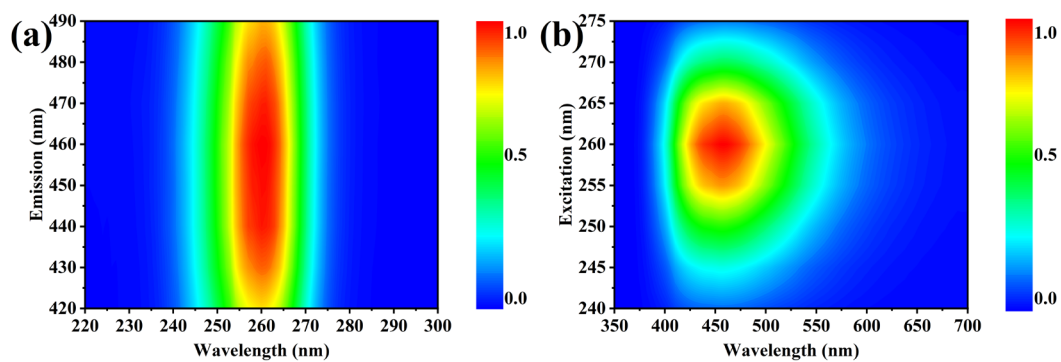

**Figure S3.** (a) The PLE spectra of  $\text{Zr}^{4+}:\text{Cs}_2\text{ZnCl}_4$  under different emission wavelength. (b) The PL spectra of  $\text{Zr}^{4+}:\text{Cs}_2\text{ZnCl}_4$  under different excitation wavelength.

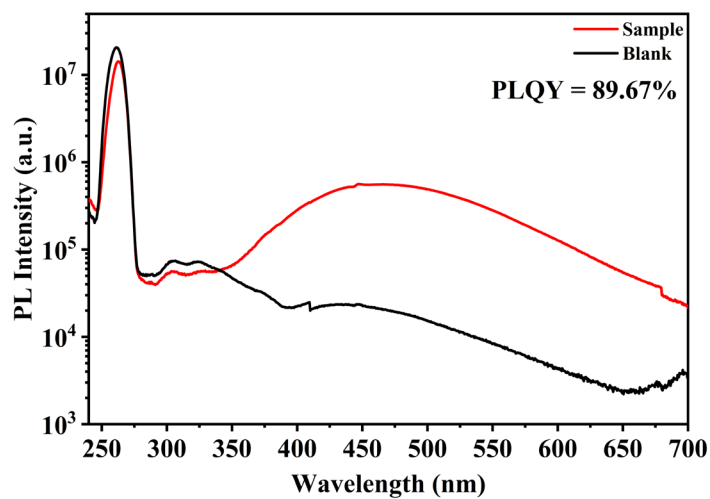

**Figure S4.** The PLQY of  $20\%\text{Zr}^{4+}:\text{Cs}_2\text{ZnCl}_4$ .

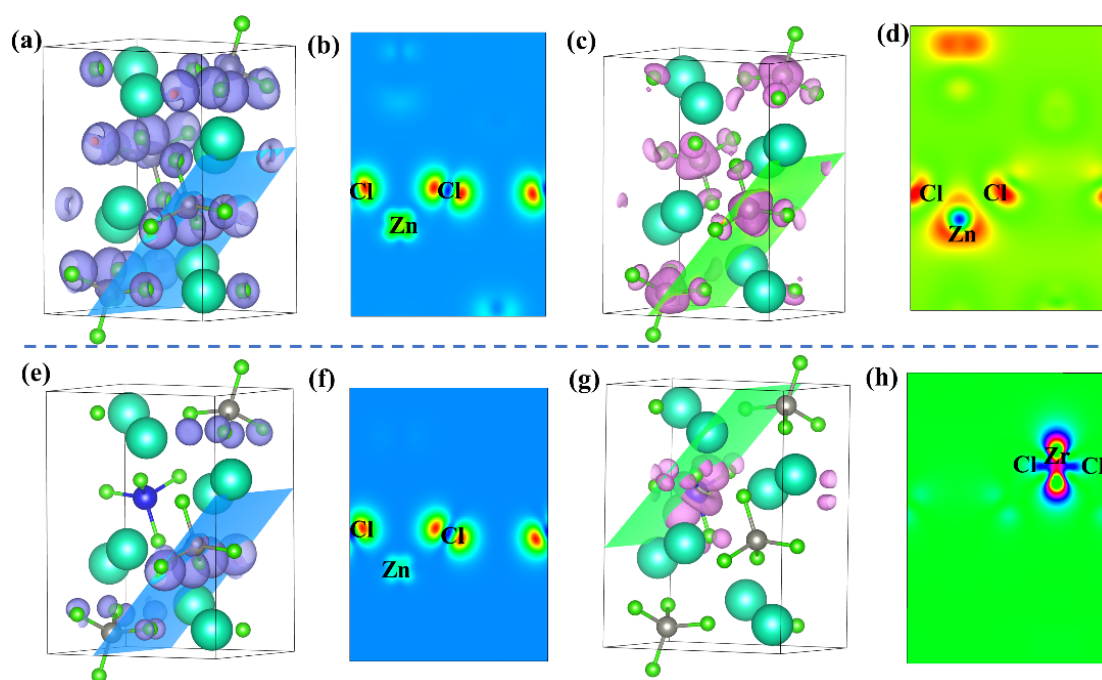

**Figure S5.** 3D and 2D Electron distribution profiles of VBM and CBM in pure (a)-(d)  $\text{Cs}_2\text{ZnCl}_4$  and (e)-(h)  $\text{Zr}^{4+}:\text{Cs}_2\text{ZnCl}_4$ , respectively.

## Reference

1. Giannozzi, P.; Baroni, S.; Bonini, N.; Calandra, M.; Car, R.; Cavazzoni, C.; Ceresoli, D.; Chiarotti, G. L.; Cococcioni, M.; Dabo, I., QUANTUM ESPRESSO: A modular and Open-Source Software Project for Quantum Simulations of Materials. *J. Phys.: Condens. Matter* **2009**, 21, (39), 395502.
